# Supplementary material for: Teaching climate risk for water planning: a pilot training for tertiary students and practitioners in Brazil
Source: Copernicus journal article supplement (doi:10.5194/gc-4-527-2021), 2021-12-20
Supplement: Supplementary file 1 [file gc-4-527-2021-supplement.zip]

## *Supplement of*

# **Teaching climate risk for water planning: a pilot training for tertiary students and practitioners in Brazil**

5

Pablo Borges de Amorim<sup>1</sup>, Pedro Luiz Borges Chaffe<sup>2</sup>

<sup>1</sup>Graduate Program in Environmental Engineering, Federal University of Santa Catarina (UFSC), Florianópolis, 88.040-970, Brazil.

10 <sup>2</sup>Department of Sanitary and Environmental Engineering, Federal University of Santa Catarina (UFSC), Florianópolis, 88.040-970, Brazil.

*Correspondence to:* Pablo Borges de Amorim ([borgesdeamorim.pablo@gmail.com](mailto:borgesdeamorim.pablo@gmail.com))

- Supplement 1 – Slide show presentation.pdf
- Supplement 2 – Set of maps.pdf
- 15 • Supplement 3 – Facilitation script.pdf
