# Supplementary material for: Teaching climate risk for water planning: a pilot training for tertiary students and practitioners in Brazil
Source: Copernicus journal article supplement (doi:10.5194/gc-4-527-2021), 2021-12-20
Supplement: Supplementary file 2 [file gc-4-527-2021-supplement.zip]

### Supplement 3

Table 1. Facilitation script for trainers.

| Sessions                                                                                     | Activity                                                                                                                                                                                                                                                                                            | Duration | Materials              | Observations                                                                                                                                                                                                                                      |
|----------------------------------------------------------------------------------------------|-----------------------------------------------------------------------------------------------------------------------------------------------------------------------------------------------------------------------------------------------------------------------------------------------------|----------|------------------------|---------------------------------------------------------------------------------------------------------------------------------------------------------------------------------------------------------------------------------------------------|
| 1.a. Introduction to the IPCC's climate risk framework                                       | Present the IPCC and its climate risk framework                                                                                                                                                                                                                                                     | 10 min   | Slideshow presentation | None                                                                                                                                                                                                                                              |
| 1.b. Interactive exercise                                                                    | A flood impact case is drawn on the blackboard and participants must answer questions about the components of climate risk                                                                                                                                                                          | 10 min   | Blackboard             | Ensure that the participants understand the drawing                                                                                                                                                                                               |
| 2.a. Introduction to the PBL exercise                                                        | Introduce the whole session and the expected results. Each group must select one person to moderate and another to control de time.                                                                                                                                                                 | 5 min    | None                   | Ensure that the group understand the exercise and that each participant has a role.                                                                                                                                                               |
| 2.b. Associate socioeconomic, biophysical, and climate data with the climate risk components | The first task is to classify the information received as: i) climate hazard, ii) exposure iii) sensitivity, or iv) adaptive capacity. The goal is that the participants learn to interpret the information received and distinguish it between the elements consisting the climate risk framework. | 15 min   | Set of maps            | It is important to ensure that the groups correctly interpret the maps received (i.e., theme and caption) and how the information is associated with the context of the case study. At the end, they have to justify and document the definition. |
| 3. Map climate risk and classify risk zones                                                  | Once the maps are classified, participants must identify the areas with significant climate risk. Groups are free to propose different risk ratings (e.g., low, medium or                                                                                                                           | 20 min   | blank map of Brazil    | It is recommended that participants use coloured pens to illustrate, for example, different classes of risk. They                                                                                                                                 |

|                                 |                                                                                                                                                                                                                                                                                                                                                                 |        |      |                                                                                                                                                                                                                             |
|---------------------------------|-----------------------------------------------------------------------------------------------------------------------------------------------------------------------------------------------------------------------------------------------------------------------------------------------------------------------------------------------------------------|--------|------|-----------------------------------------------------------------------------------------------------------------------------------------------------------------------------------------------------------------------------|
|                                 | high). Each group receives a blank map of Brazil with which the participants must illustrate the areas at risk.                                                                                                                                                                                                                                                 |        |      | have to justify and document the scales and definitions.                                                                                                                                                                    |
| 4. Assess adaptation options    | Participants should discuss which factors affect the level of risk at most and, based on them, what actions can be proposed to the government to reduce the risk.                                                                                                                                                                                               | 20 min | None | Participants have to focus on the maps received (e.g., delimiting areas of occupation).                                                                                                                                     |
| 5. Communicate via presentation | Groups should start the presentation by showing first the classification of the information received and the reasons for such classification. Soon after, the group presents the climate risk map and the criteria adopted for the definition of risk areas. In the end, the group proposes risk reduction measures and what extra information could be useful. | 30 min | None | If the tutor perceives inconsistencies in the risk classification (e.g., hazard rather than adaptation capacity), it is important to ask questions that lead participants to reflect on the classification adopted by them. |
