# Supplementary material for: Teaching climate risk for water planning: a pilot training for tertiary students and practitioners in Brazil
Source: Copernicus journal article supplement (doi:10.5194/gc-4-527-2021), 2021-12-20
Supplement: Supplementary file 3 [file gc-4-527-2021-supplement.zip]

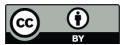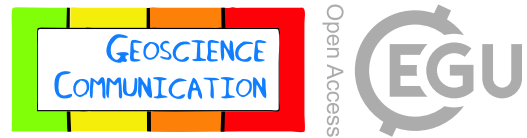

## *Supplement of*

# **Teaching climate risk for water planning: a pilot training for tertiary students and practitioners in Brazil**

**Pablo Borges de Amorim and Pedro Luiz Borges Chaffe**

*Correspondence to:* Pablo Borges de Amorim ([borgesdeamorim.pablo@gmail.com](mailto:borgesdeamorim.pablo@gmail.com))

- [gc-4-527-2021-supplement-title-page.pdf](#)
- [Supplement\\_gc-2021-23](#)
  - [Supplement 1\\_Slide show presentation.pdf](#)
  - [Supplement 2\\_Set of maps.pdf](#)
  - [Supplement 3\\_Facilitation script.pdf](#)
  - [Supplement\\_title\\_page\\_gc-2021-23.pdf](#)

The copyright of individual parts of the supplement might differ from the article licence.
